# Supplementary material for: The Burden of Loss: Unexpected Death of a Loved One and Psychiatric Disorders Across the Life Course in a National Study
Source: Atypon-hosted journal article supplement (doi:10.1176/appi.ajp.2014.13081132), 2014-05-16

Table S1. Sample demographics (N=27,534)\*

|                                                                                                                                                                                                                                            | <b>N</b> | <b>% (SE)</b> |
|--------------------------------------------------------------------------------------------------------------------------------------------------------------------------------------------------------------------------------------------|----------|---------------|
| <b><u>Age</u></b>                                                                                                                                                                                                                          |          |               |
| 20-29                                                                                                                                                                                                                                      | 3568     | 14.7 (0.3)    |
| 30-44                                                                                                                                                                                                                                      | 8191     | 29.4 (0.4)    |
| 45-64                                                                                                                                                                                                                                      | 9835     | 36.1 (0.4)    |
| 65+                                                                                                                                                                                                                                        | 5760     | 19.8 (0.4)    |
| <b><u>Sex</u></b>                                                                                                                                                                                                                          |          |               |
| Male                                                                                                                                                                                                                                       | 11368    | 47.33 (0.4)   |
| Female                                                                                                                                                                                                                                     | 15986    | 52.7 (0.4)    |
| <b><u>Race/ethnicity</u></b>                                                                                                                                                                                                               |          |               |
| Non-Hispanic White                                                                                                                                                                                                                         | 16470    | 72.8 (1.4)    |
| Non-Hispanic Black                                                                                                                                                                                                                         | 5241     | 11.0 (0.7)    |
| Non-Hispanic Asian or Pacific Islander                                                                                                                                                                                                     | 495      | 2.4 (0.2)     |
| Non-Hispanic Native American or Alaska Native                                                                                                                                                                                              | 645      | 3.5 (0.4)     |
| Hispanic                                                                                                                                                                                                                                   | 4503     | 10.3 (1.0)    |
| <b><u>Marital status</u></b>                                                                                                                                                                                                               |          |               |
| Married/living with someone                                                                                                                                                                                                                | 14780    | 64.0 (0.5)    |
| Widowed/separated/divorced                                                                                                                                                                                                                 | 7505     | 19.7 (0.3)    |
| Never married                                                                                                                                                                                                                              | 5069     | 16.3 (0.5)    |
| <b><u>Personal income</u></b>                                                                                                                                                                                                              |          |               |
| \$0-19,999                                                                                                                                                                                                                                 | 11806    | 41.5 (0.6)    |
| \$20-34,999                                                                                                                                                                                                                                | 6406     | 23.1 (0.4)    |
| \$35-69,999                                                                                                                                                                                                                                | 6540     | 24.6 (0.4)    |
| \$70,000+                                                                                                                                                                                                                                  | 2602     | 10.8 (0.5)    |
| <b><u>Education</u></b>                                                                                                                                                                                                                    |          |               |
| Less than high school                                                                                                                                                                                                                      | 4169     | 13.5 (0.4)    |
| High school                                                                                                                                                                                                                                | 16052    | 59.3 (0.6)    |
| More than high school                                                                                                                                                                                                                      | 7133     | 27.2 (0.7)    |
| * Full sample size 34,653. We removed individuals for whom the worst potentially traumatic event was related to 9/11/01, except those that lost a loved on in a terrorist attack. A total of 7,255 were removed from the analytic dataset. |          |               |

Table S2. Distribution of unexpected death, other traumatic experiences, and lifetime prevalence of psychiatric disorders (N=27,534\*)

|                                                                   | Prevalence (SE)          | Mean age of onset (SE) | Range |
|-------------------------------------------------------------------|--------------------------|------------------------|-------|
| <b><u>Unexpected death of a loved one</u></b>                     | 50.3 (0.6)               | --                     | --    |
| Age of first experience                                           | --                       | 29.2 (0.2)             | 1-90  |
| Number of experiences                                             | --                       | 2.1 (0.02)             | 1-10  |
| <b><u>Traumatic experiences excluding unexpected death</u></b>    | Lifetime prevalence (SE) |                        |       |
| 0                                                                 | 16.5 (0.5)               | --                     | --    |
| 1-2                                                               | 44.1 (0.4)               | --                     | --    |
| 3-4                                                               | 23.7 (0.5)               | --                     | --    |
| 5+                                                                | 15.7 (0.4)               | --                     | --    |
|                                                                   | Lifetime prevalence (SE) | Mean age of onset (SE) | Range |
| <b><u>Psychiatric disorders and mental health service use</u></b> |                          |                        |       |
| Major depression                                                  | 23.7 (0.4)               | 32.8 (0.2)             | 5-97  |
| Dysthymia                                                         | 5.7 (0.2)                | 34.1 (0.5)             | 5-90  |
| Manic episode                                                     | 5.7 (0.2)                | 30.1 (0.4)             | 5-90  |
| Alcohol disorder                                                  | 35.9 (0.7)               | 28.6 (0.2)             | 5-90  |
| GAD                                                               | 8.5 (0.2)                | 37.4 (0.4)             | 5-90  |
| Social phobia                                                     | 7.4 (0.2)                | 18.9 (0.3)             | 5-90  |
| Specific phobia                                                   | 16.0 (0.4)               | 20.9 (0.2)             | 5-93  |
| Panic disorder                                                    | 8.1 (0.2)                | 32.9 (0.3)             | 5-93  |

\* Full sample size 34,653. We removed individuals for whom the worst potentially traumatic event was related to 9/11/01, except those that lost a loved one in a terrorist attack. A total of 7,119 were removed from the analytic dataset. Prevalence estimates of psychiatric disorders are slightly higher than other published reports due to the removal of individuals who perceived indirect exposure to 9/11 as their worst potentially traumatic experience.

Table S3. Incidence of common psychiatric disorders based on unexpected death experience overall and age of first experience

|                                             |              |           | Major depression | Dysthymia  | Manic episode | GAD        | PTSD       | Social Phobia | Specific phobia | Panic disorder | Alcohol disorder |
|---------------------------------------------|--------------|-----------|------------------|------------|---------------|------------|------------|---------------|-----------------|----------------|------------------|
|                                             |              | N         |                  |            |               |            |            |               |                 |                |                  |
| <b>No unexpected death</b>                  |              | 13,478    | 20.6 (0.5)       | 4.9 (0.2)  | 4.6 (0.2)     | 6.6 (0.3)  | 7.8 (0.3)  | 6.2 (0.3)     | 13.3 (0.5)      | 6.5 (0.3)      | 32.1 (0.9)       |
| <b>Lifetime unexpected death occurrence</b> |              | 13,876    | 26.9 (0.5)       | 6.5 (0.3)  | 6.8 (0.3)     | 10.4 (0.3) | 15.2 (0.4) | 8.6 (0.3)     | 18.8 (0.5)      | 9.8 (0.3)      | 39.9 (0.7)       |
| <b>Unexpected death occurrence at age*:</b> | <b>5-9</b>   | 750       | 8.0 (3.0)        | 6.2 (4.3)  | --            | 6.1 (3.0)  | 8.6 (1.8)  | 1.0 (0.4)     | 0.7 (0.1)       | 1.1 (0.8)      | --               |
|                                             | <b>10-14</b> | 1397      | 10.3 (1.9)       | 6.6 (2.8)  | 9.1 (3.9)     | 5.0 (2.7)  | 21.9 (2.2) | 4.7 (0.8)     | 2.7 (0.5)       | 11.4 (4.1)     | 11.1 (4.7)       |
|                                             | <b>15-19</b> | 2,164     | 10.9 (1.3)       | 7.6 (2.2)  | 9.4 (1.8)     | 6.9 (1.9)  | 26.7 (2.1) | 4.8 (0.8)     | 4.7 (0.7)       | 10.4 (2.1)     | 7.9 (0.7)        |
|                                             | <b>20-24</b> | 1,685     | 9.9 (1.2)        | 10.2 (3.0) | 7.2 (1.7)     | 9.4 (2.2)  | 24.1 (2.0) | 6.4 (1.9)     | 5.4 (1.0)       | 9.9 (1.7)      | 7.6 (0.8)        |
|                                             | <b>25-29</b> | 1,426     | 7.8 (1.0)        | 12.5 (3.9) | 3.9 (1.2)     | 7.9 (2.1)  | 32.6 (2.5) | 7.6 (2.8)     | 5.1 (1.1)       | 6.9 (1.4)      | 6.8 (1.1)        |
|                                             | <b>30-34</b> | 1,297     | 7.4 (1.0)        | 8.8 (2.5)  | 5.4 (2.0)     | 6.2 (1.6)  | 27.5 (2.5) | 4.2 (1.9)     | 6.5 (1.2)       | 5.4 (1.2)      | 4.7 (1.0)        |
|                                             | <b>35-39</b> | 1,145     | 9.0 (1.3)        | 6.1 (2.4)  | 9.2 (2.5)     | 7.0 (1.5)  | 27.8 (3.1) | 4.6 (2.1)     | 6.2 (1.3)       | 7.7 (1.7)      | 5.1 (0.9)        |
|                                             | <b>40-44</b> | 1033      | 5.9 (1.0)        | 4.8 (1.6)  | 8.0 (2.5)     | 7.9 (2.0)  | 31.8 (3.2) | 6.5 (2.5)     | 4.8 (1.1)       | 5.2 (1.2)      | 5.2 (1.0)        |
|                                             | <b>45-49</b> | 787       | 12.2 (1.7)       | 11.4 (3.7) | 8.5 (2.6)     | 6.7 (1.6)  | 25.5 (3.3) | 8.5 (2.8)     | 6.1 (1.4)       | 6.2 (2.0)      | 3.9 (1.0)        |
|                                             | <b>50-54</b> | 620       | 7.2 (1.5)        | 10.5 (3.1) | 5.8 (2.6)     | 5.3 (1.4)  | 26.5 (3.8) | 8.0 (3.1)     | 5.8 (1.3)       | 4.1 (1.6)      | 7.5 (1.7)        |
|                                             | <b>55-59</b> | 440       | 10.6 (2.3)       | 7.0 (2.9)  | 9.7 (4.7)     | 5.6 (1.7)  | 29.4 (4.7) | --            | 4.6 (1.4)       | 7.0 (3.2)      | 4.9 (2.2)        |
|                                             | <b>60-64</b> | 313       | 11.5 (2.9)       | 9.5 (4.5)  | --            | 8.5 (3.3)  | 36.0 (6.2) | --            | 3.4 (1.3)       | 4.5 (2.6)      | 7.4 (2.9)        |
|                                             | <b>65-69</b> | 201       | 11.2 (3.7)       | --         | 5.8 (5.2)     | 14.9 (7.9) | 32.9 (7.6) | --            | 7.9 (4.4)       | --             | 7.1 (3.5)        |
| <b>70+</b>                                  | 324          | 7.1 (1.9) | 6.6 (2.8)        | 9.4 (6.1)  | 8.4 (2.5)     | 21.9 (2.2) | --         | 9.5 (2.3)     | 4.2 (2.0)       | 7.8 (3.0)      |                  |

\* There were 294 missing responses on age of first unexpected death experience

Table S4. Limiting the sample to those who experienced their first unexpected death within 10 years of the interview (N=19,316): Association between age of first unexpected death of a loved one and onset of psychiatric disorders

|                                     |                  | Major depression    | Dysthymia          | Manic episode      | GAD                | PTSD                 |
|-------------------------------------|------------------|---------------------|--------------------|--------------------|--------------------|----------------------|
| Unexpected death occurrence at age: | 5-9              | --                  | --                 | --                 | --                 | --                   |
|                                     | 10-14            | 2.05 (0.77-5.49)    | 1.24 (0.13-11.85)  | 0.92 (0.20-4.30)   | 3.35 (0.51-21.89)  | 3.25 (1.36-7.77)     |
|                                     | 15-19            | 3.06 (2.06-4.57)    | 2.16 (0.98-4.73)   | 2.81 (1.79-4.40)   | 1.34 (0.66-2.74)   | 4.64 (3.18-6.76)     |
|                                     | 20-24            | 3.09 (2.13-4.49)    | 1.21 (0.51-2.90)   | 2.22 (1.32-3.74)   | 2.22 (1.12-4.42)   | 5.47 (3.79-7.89)     |
|                                     | 25-29            | 3.23 (2.08-5.03)    | 5.13 (2.28-1.55)   | 2.53 (1.44-4.44)   | 2.88 (1.47-5.61)   | 12.25 (8.84-16.98)   |
|                                     | 30-34            | 3.92 (2.70-5.70)    | 1.89 (0.87-4.08)   | 3.81 (2.06-7.06)   | 2.08 (1.15-3.79)   | 10.67 (7.46-15.26)   |
|                                     | 35-39            | 5.03 (3.38-7.49)    | 1.48 (0.48-4.55)   | 4.77 (2.57-8.85)   | 2.98 (1.65-5.37)   | 12.62 (8.48-18.79)   |
|                                     | 40-44            | 3.21 (2.00-5.17)    | 1.88 (0.84-4.20)   | 5.57 (3.02-10.26)  | 4.23 (2.31-7.76)   | 17.21 (11.50-25.76)  |
|                                     | 45-49            | 7.34 (4.22-12.76)   | 4.76 (2.27-9.98)   | 4.06 (1.82-9.10)   | 3.85 (2.02-7.35)   | 13.94 (8.36-23.25)   |
|                                     | 50-54            | 5.40 (3.19-9.12)    | 5.72 (2.30-14.22)  | 2.72 (1.10-6.72)   | 4.11 (2.12-7.95)   | 22.64 (14.76-34.74)  |
|                                     | 55-59            | 13.52 (6.83-26.74)  | 9.51 (3.96-22.81)  | 16.12 (5.64-46.03) | 7.82 (3.78-16.18)  | 33.27 (17.99-61.52)  |
|                                     | 60-64            | 9.74 (4.27-22.23)   | 9.11 (2.22-37.46)  | --                 | 14.95 (5.23-42.76) | 40.06 (20.32-78.97)  |
|                                     | 65-69            | 27.89 (11.12-69.96) | --                 | 4.64 (0.34-62.80)  | 16.17 (6.31-41.40) | 52.73 (18.95-146.72) |
| 70+                                 | 4.38 (2.22-8.65) | 4.60 (1.21-17.43)   | 5.66 (1.12-28.54)  | --                 | 13.61 (6.45-28.70) |                      |
| <hr/>                               |                  |                     |                    |                    |                    |                      |
|                                     |                  | Social Phobia       | Specific phobia    | Panic disorder     | Alcohol disorder   |                      |
| Unexpected death occurrence at age: | 5-9              | --                  | --                 | --                 | --                 |                      |
|                                     | 10-14            | 1.26 (0.48-3.33)    | 1.36 (0.61-3.01)   | 6.12 (1.60-23.49)  | 2.37 (0.29-19.36)  |                      |
|                                     | 15-19            | 0.78 (0.44-1.37)    | 1.62 (1.05-2.51)   | 2.71 (1.54-4.77)   | 1.04 (0.69-1.56)   |                      |
|                                     | 20-24            | 1.07 (0.36-3.13)    | 1.47 (0.94-2.31)   | 2.01 (1.20-3.37)   | 1.75 (1.20-2.56)   |                      |
|                                     | 25-29            | 3.14 (1.32-7.49)    | 1.89 (1.23-2.90)   | 2.82 (1.65-4.81)   | 2.29 (1.49-3.54)   |                      |
|                                     | 30-34            | 2.04 (0.79-5.27)    | 2.86 (1.92-4.27)   | 2.56 (1.56-4.19)   | 2.15 (1.34-3.45)   |                      |
|                                     | 35-39            | 4.55 (1.78-11.61)   | 2.50 (1.36-4.58)   | 4.12 (2.31-7.36)   | 2.14 (1.42-3.22)   |                      |
|                                     | 40-44            | 2.60 (1.12-6.02)    | 2.68 (1.60-4.48)   | 2.02 (1.04-3.93)   | 2.52 (1.58-4.02)   |                      |
|                                     | 45-49            | 4.55 (2.25-9.20)    | 3.22 (1.86-5.55)   | 3.56 (2.04-6.22)   | 2.40 (1.09-5.31)   |                      |
|                                     | 50-54            | 6.24 (2.56-15.23)   | 4.79 (2.99-7.65)   | 2.25 (0.96-5.27)   | 5.38 (3.03-9.57)   |                      |
|                                     | 55-59            | --                  | 5.54 (2.82-10.90)  | 8.26 (2.89-23.58)  | 4.79 (1.94-11.79)  |                      |
|                                     | 60-64            | --                  | 5.30 (2.18-12.90)  | 4.62 (1.17-18.19)  | 10.18 (3.90-26.55) |                      |
|                                     | 65-69            | --                  | 12.59 (4.79-33.10) | --                 | 10.67 (3.46-32.96) |                      |
| 70+                                 | --               | --                  | 4.06 (1.34-12.30)  | 3.72 (1.36-10.18)  |                    |                      |



Figure S2. Among those with dysthymia, age of disorder onset distribution by age of first unexpected death experience

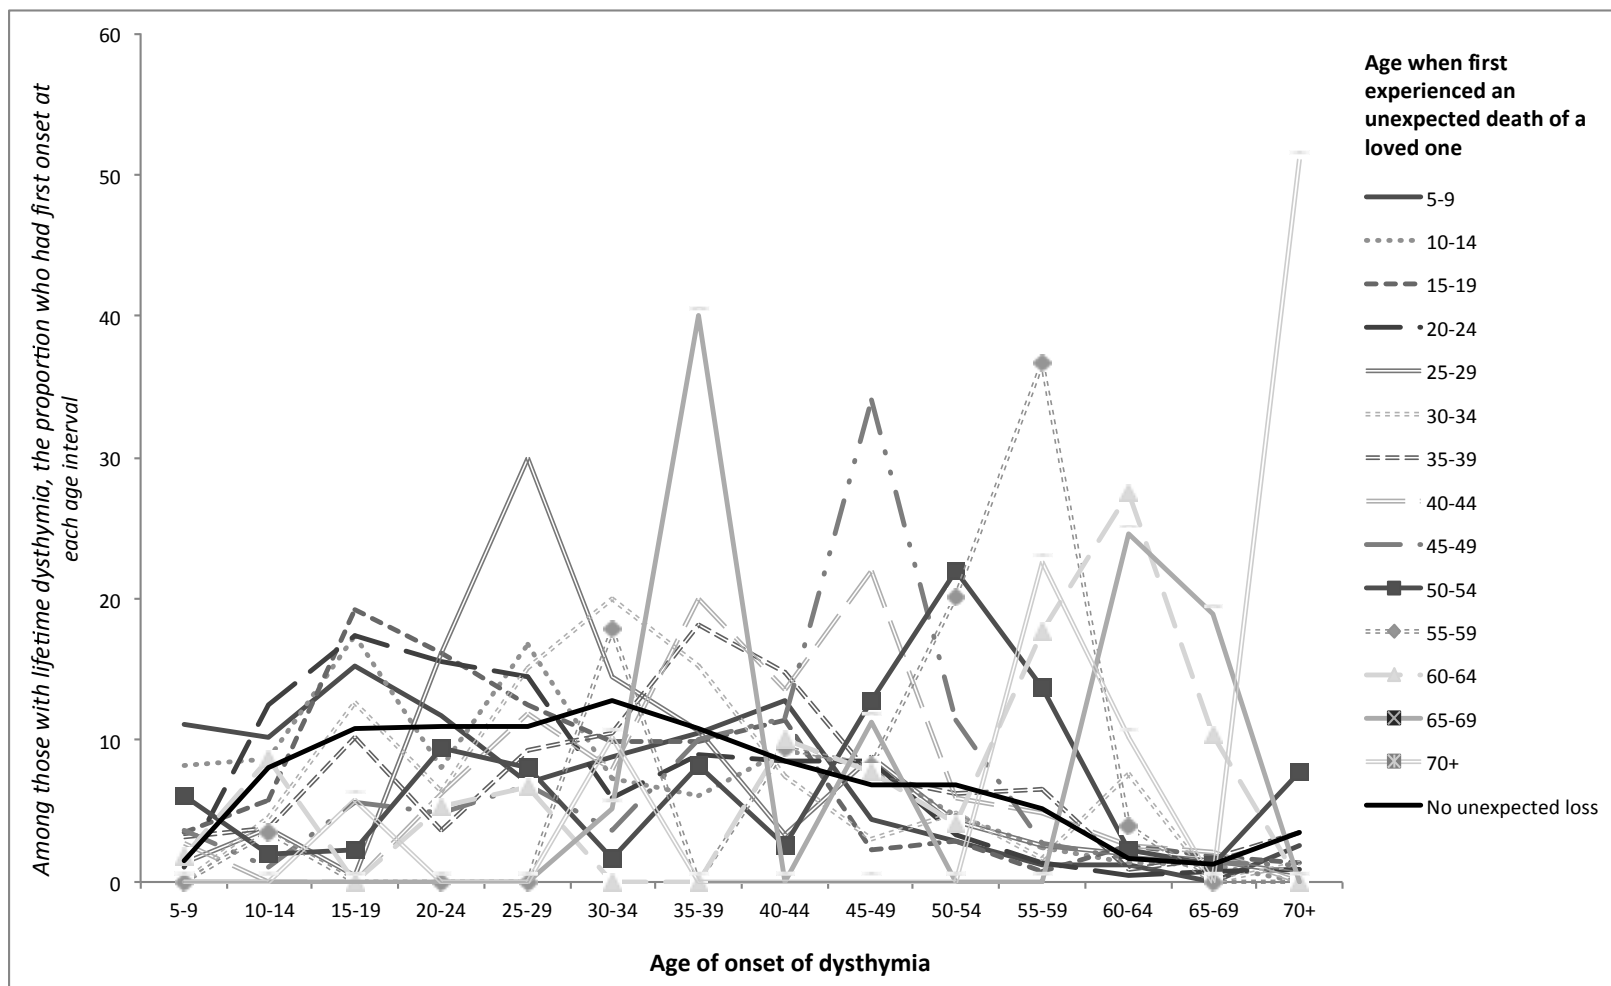



Figure S4. Among those with manic episodes, age of disorder onset distribution by age of first unexpected death experience

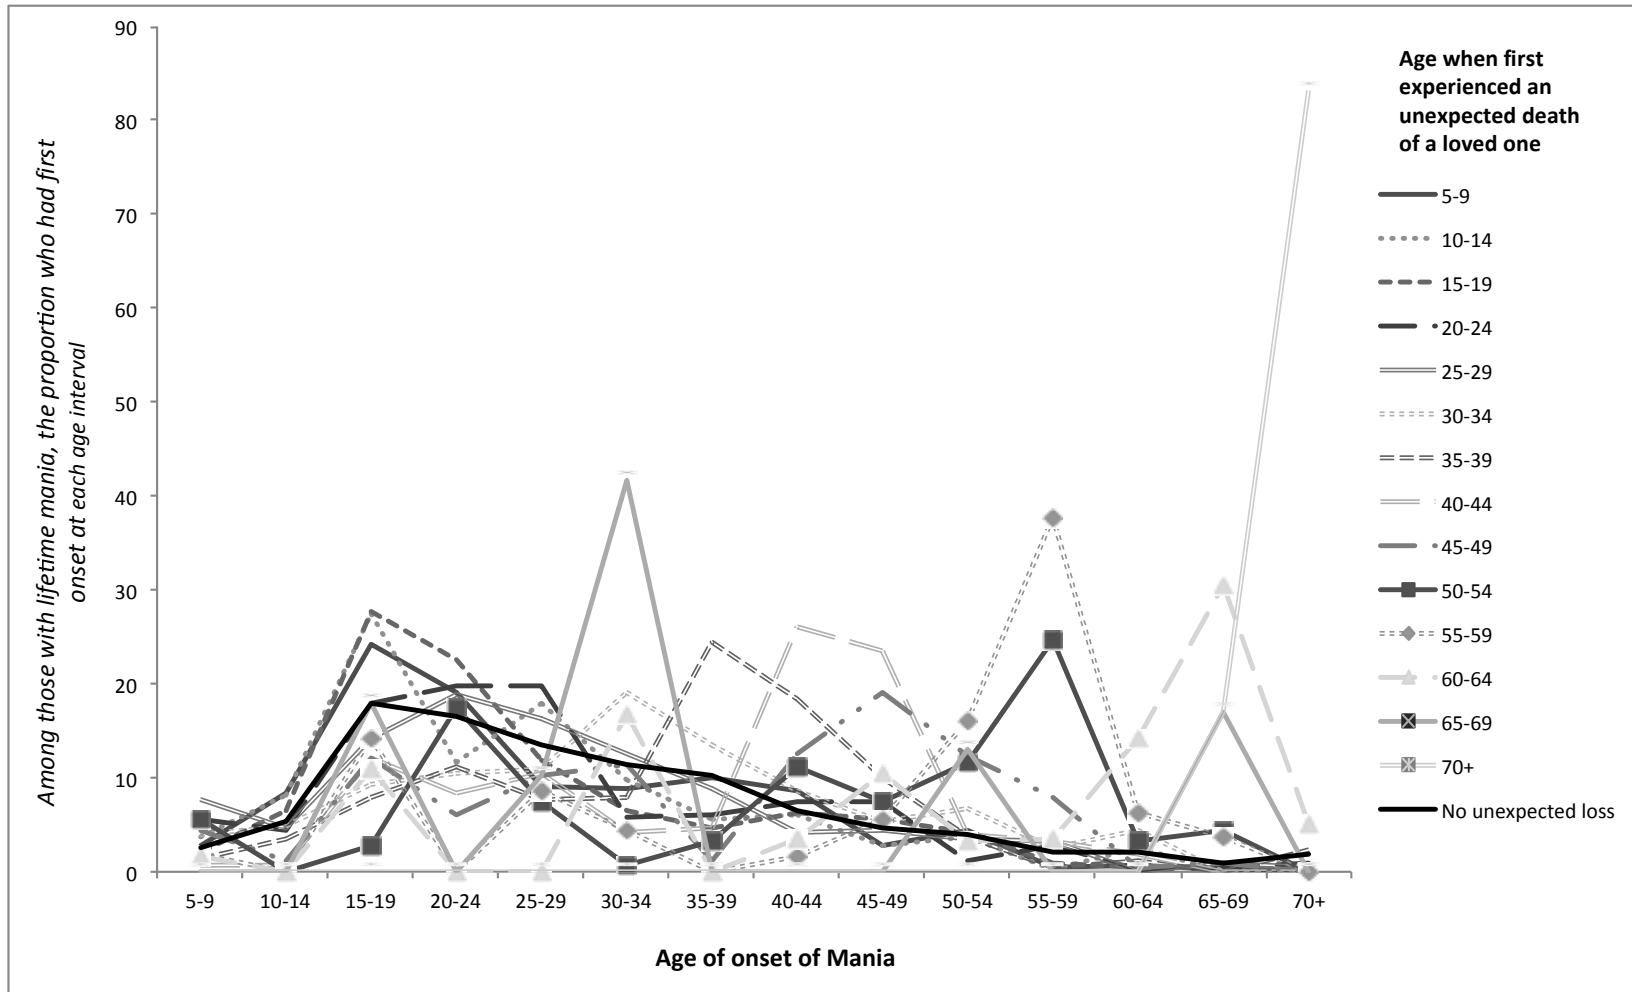







Figure S7. Among those with alcohol disorder, age of disorder onset distribution by age of first unexpected death experience

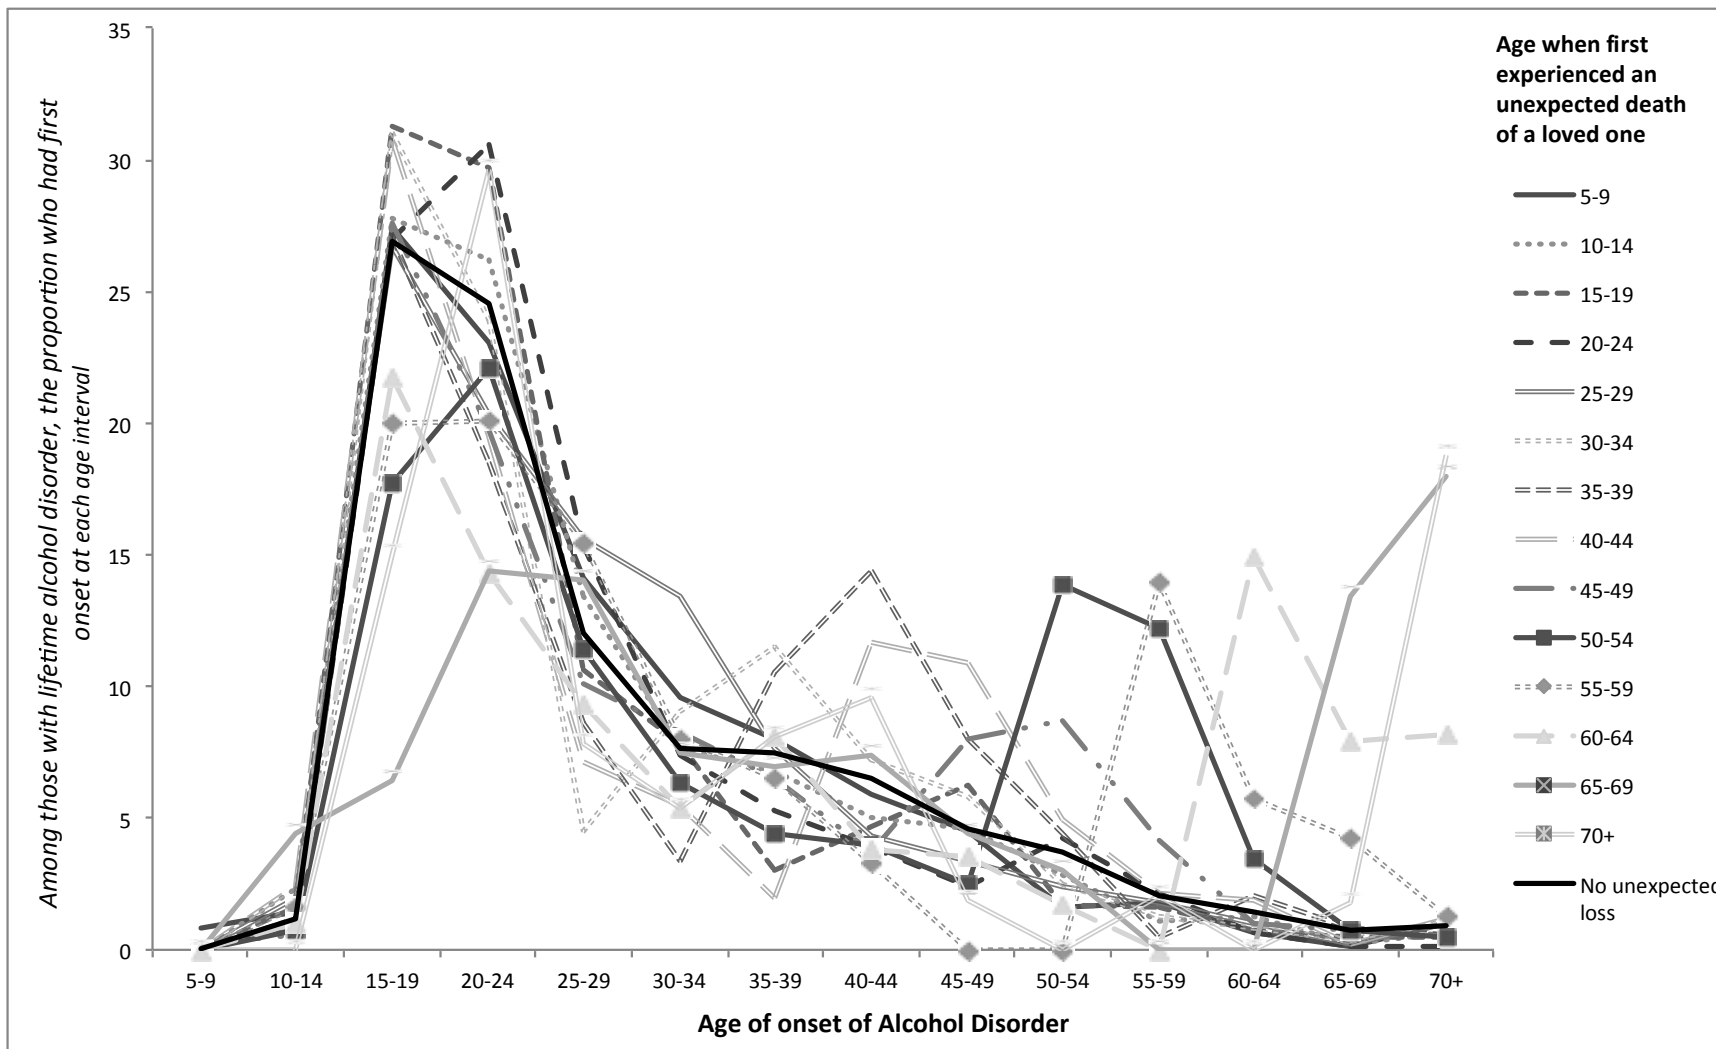

Figure S8. Among those with social phobia, age of disorder onset distribution by age of first unexpected death experience

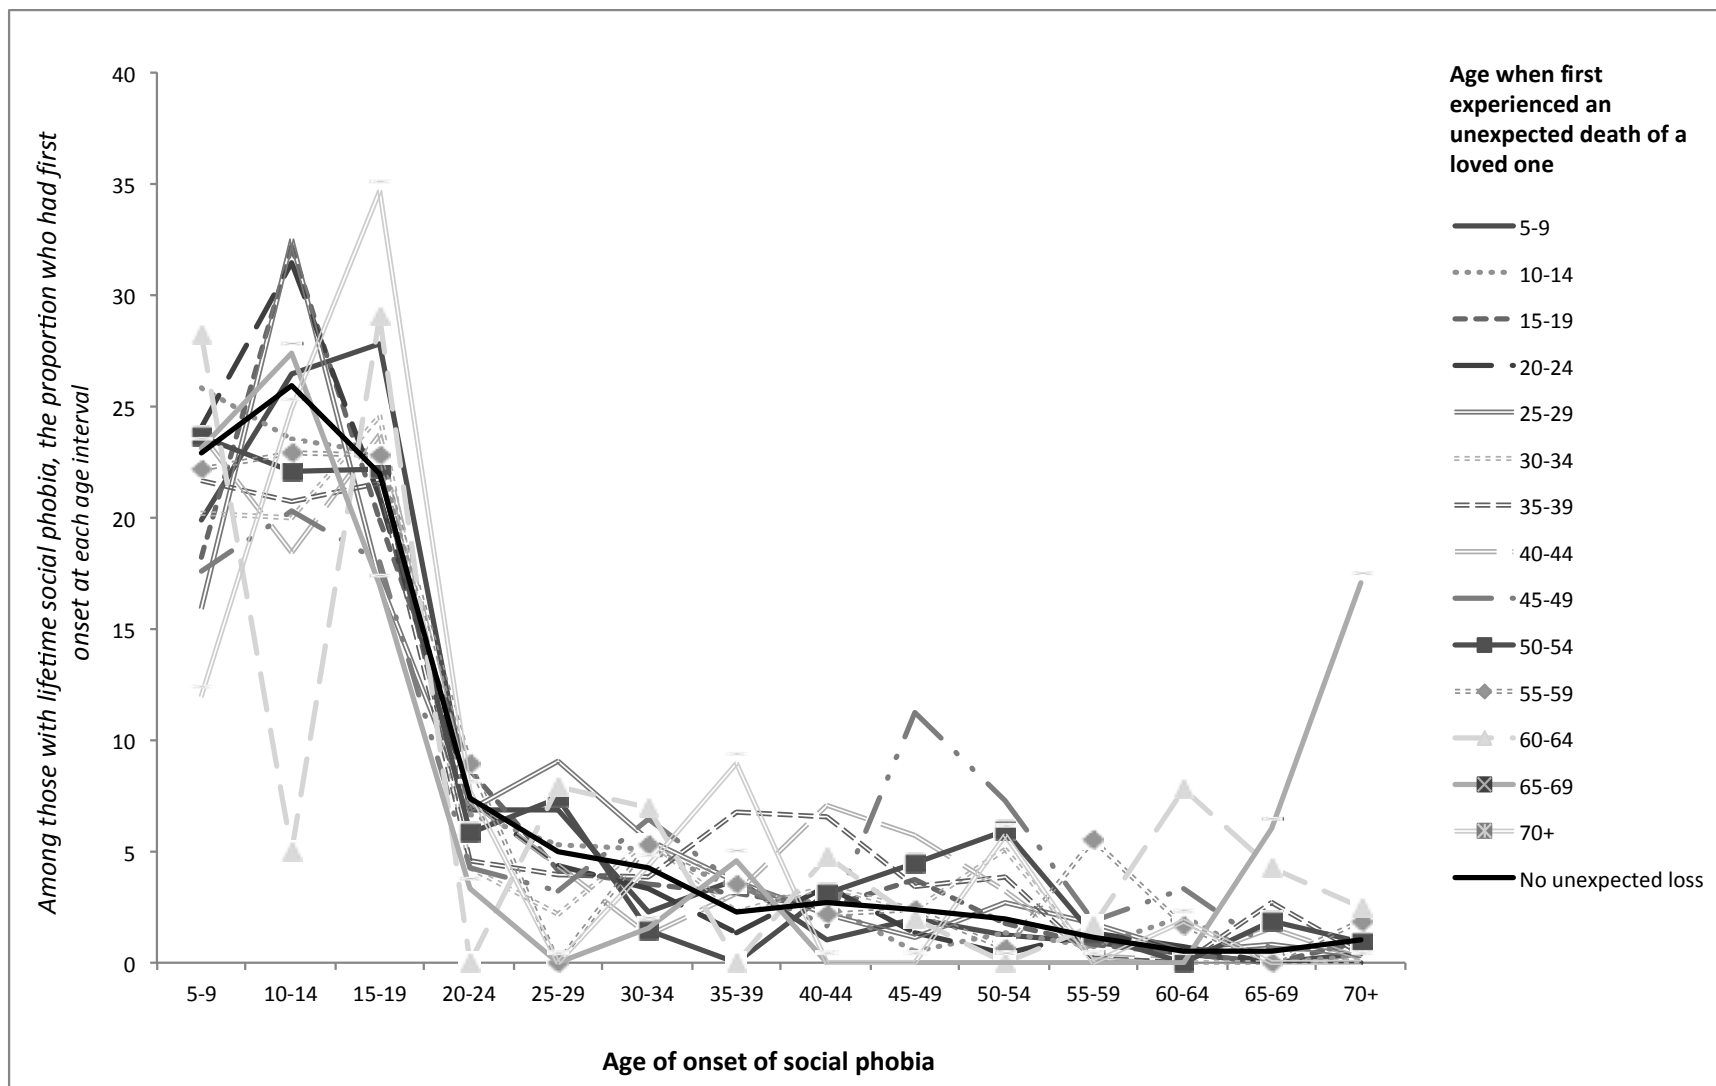

Supplement: 864_ds001.pdf [file 864_ds001.pdf]
